# Supplementary material for: Ambient PM2.5 and risk of emergency room visits for myocardial infarction: impact of regional PM2.5 oxidative potential: a case-crossover study
Source: PubMed Central journal article supplement (PMC4806515; doi:10.1186/s12940-016-0129-9), 2016-03-24

ADDITIONAL FILE 3

Ambient PM<sub>2.5</sub> and Risk of Emergency Room Visits for Myocardial Infarction:  
Impact of Regional PM<sub>2.5</sub> Oxidative Potential: A Case-Crossover Study

Scott Weichenthal  
Health Canada  
269 Laurier Ave West, Ottawa, Ontario, Canada, K1A 0K9  
Email: scott.weichenthal@hc-sc.gc.ca

Eric Lavigne  
Health Canada  
269 Laurier Ave West, Ottawa, Ontario, Canada, K1A 0K9  
Email: eric.lavigne@hc-sc.gc.ca

Greg Evans  
University of Toronto  
200 College St, Toronto, Ontario, Canada, M5S 3E5  
greg.evans@utoronto.ca

Krystal Pollitt  
University of Massachusetts  
686 North Pleasant Street, Amherst, Massachusetts, 01003, USA  
kpollitt@umass.edu

Rick T Burnett  
Health Canada  
50 Colombine Driveway, Ottawa, Ontario, Canada, K1A 0K9  
Email: rick.burnett@hc-sc.gc.ca

**Correspondence\***

Scott Weichenthal  
269 Laurier Ave West, Ottawa, Ontario, Canada, K1A 0K9  
Telephone: 613-948-7765; Fax: 613-954-7612; Email: scott.weichenthal@hc-sc.gc.ca

## Supplemental Figures

Figure S1. Total sampling days for regional oxidative potential (OP) at each site (2012-2013). Values below the 10<sup>th</sup> percentile (30 days, indicated by the red vertical line) were excluded for sensitivity analyses

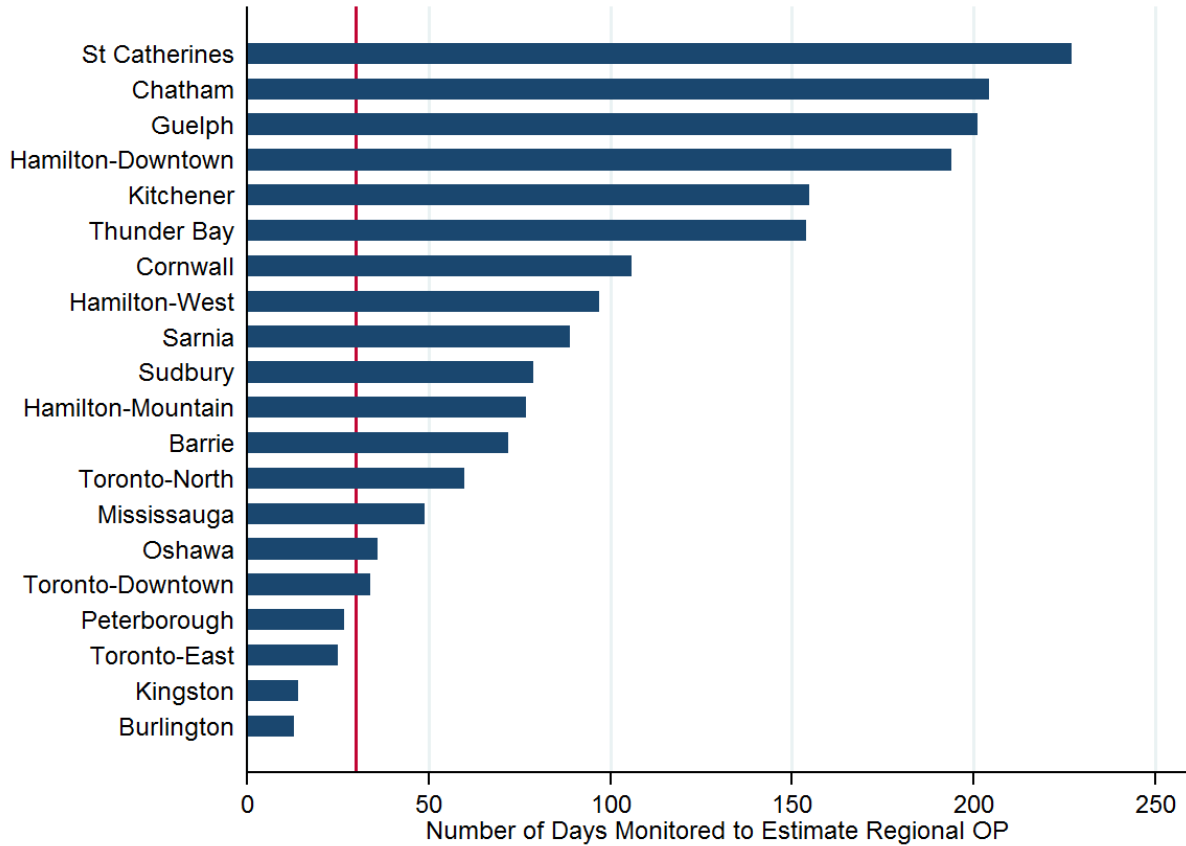

Figure S2. Regional estimates of glutathione ( $OP^{GSH}$ ) and ascorbate ( $OP^{AA}$ )-related oxidative potential in Ontario, Canada (2012-2013)

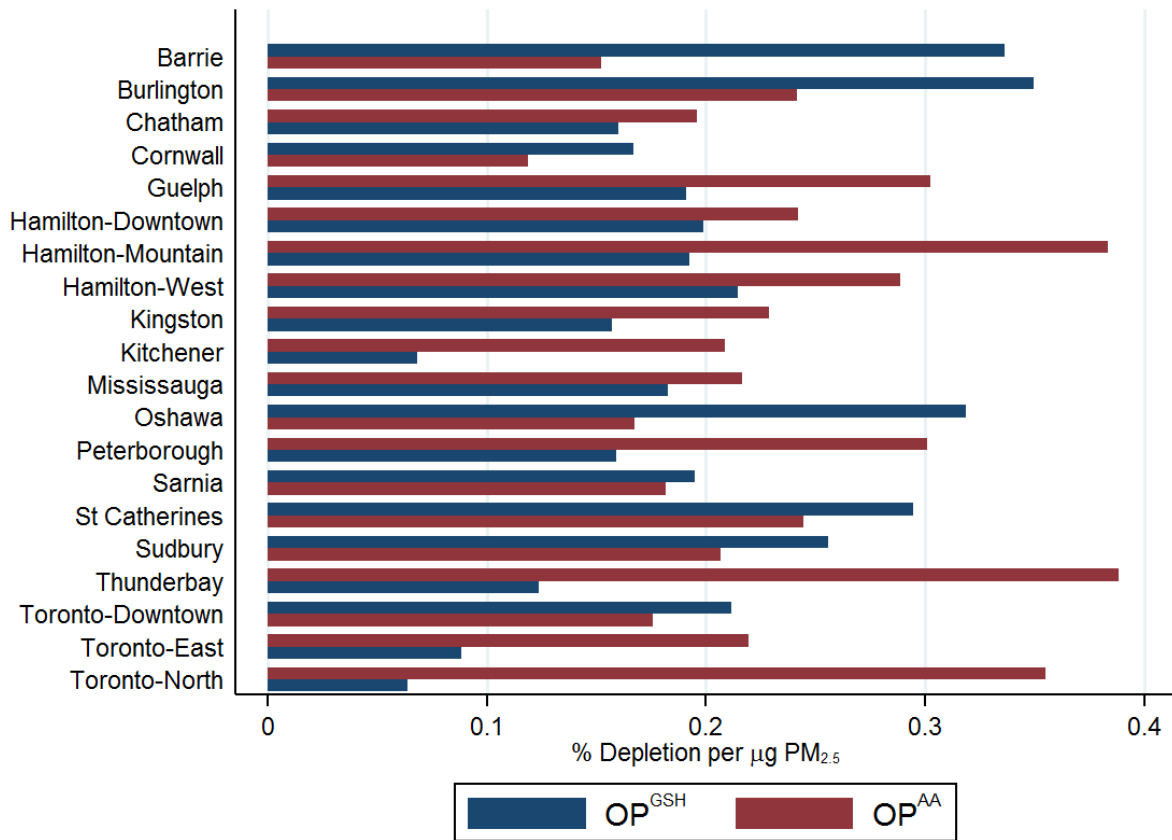

Figure S3. Distribution of daily PM<sub>2.5</sub> mass concentrations across quartiles of glutathione-related oxidative potential (OP<sup>GSH</sup>)

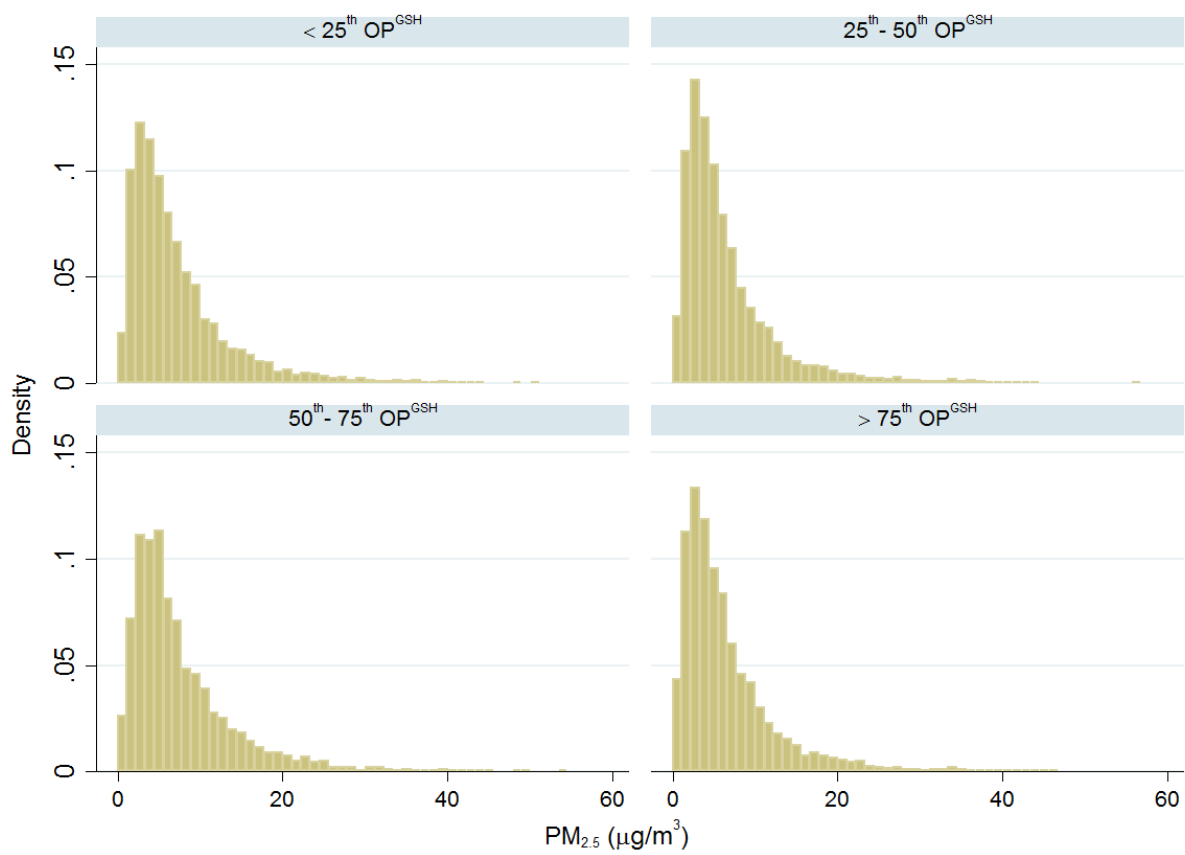

Figure S4. Ambient PM<sub>2.5</sub>, PM<sub>2.5</sub> oxidative burden and emergency room visits for myocardial infarction: sensitivity analyses excluding sites with less than 1-month of oxidative potential data. Risk estimates reflect a 5 μg/m<sup>3</sup> increase in lag-0 PM<sub>2.5</sub> and 1 unit changes in PM<sub>2.5</sub>\*GSH and PM<sub>2.5</sub>\*AA. All models are adjusted for 3-day mean ambient temperature and relative humidity (cubic splines).

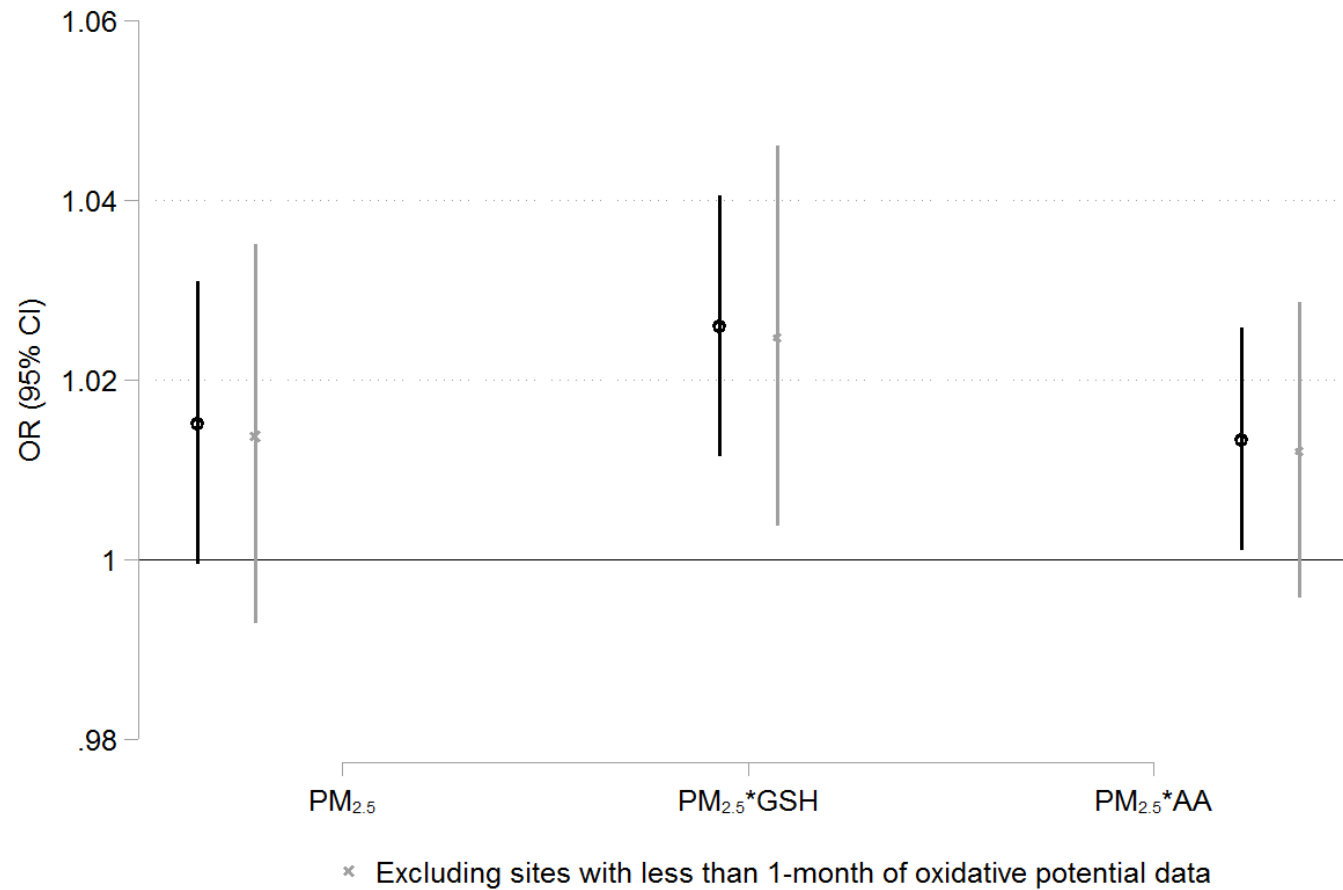

Figure S5. Concentration response plots (using cubic splines with 4 knots ) for NO<sub>2</sub>, O<sub>3</sub>, and O<sub>x</sub> and risk of emergency room visits for myocardial infarction adjusted for lag-0 PM<sub>2.5</sub>\*GSH and 3-day mean ambient temperature and relative humidity. Slopes for NO<sub>2</sub> and O<sub>3</sub> increase in two-pollutant models (i.e. including NO<sub>2</sub> and O<sub>3</sub>) compared to single pollutant models.

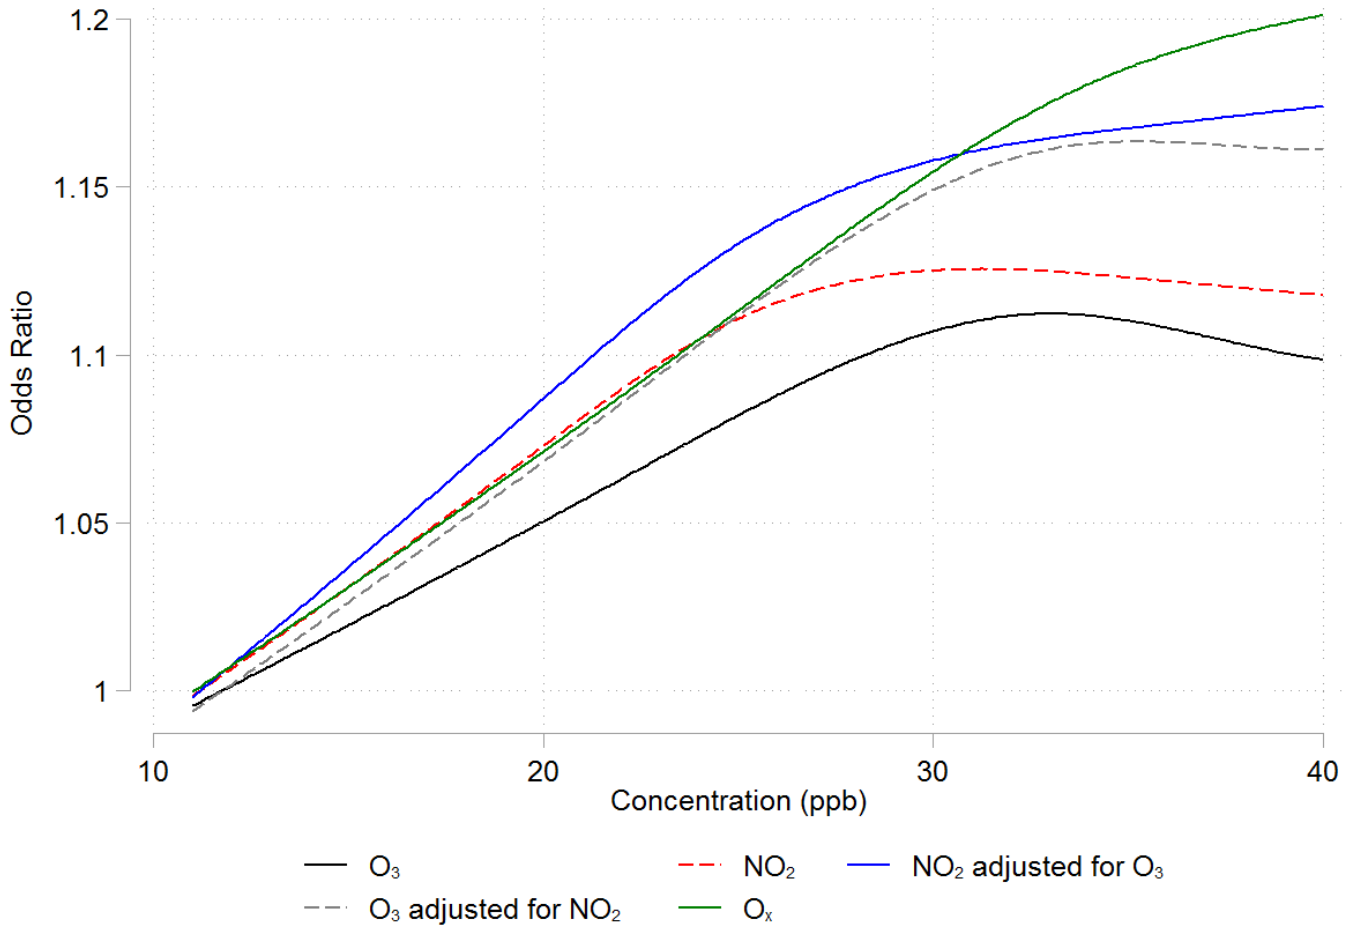

Figure S6. Concentration response plots for  $PM_{2.5}$  and risk of emergency room visits for myocardial infarction above the 90<sup>th</sup> percentile of  $OP^{GSH}$  (black line) and below the 50<sup>th</sup> percentile (gray line) using cubic splines with 4 knots. All models are adjusted for 3-day mean ambient temperature and relative humidity.

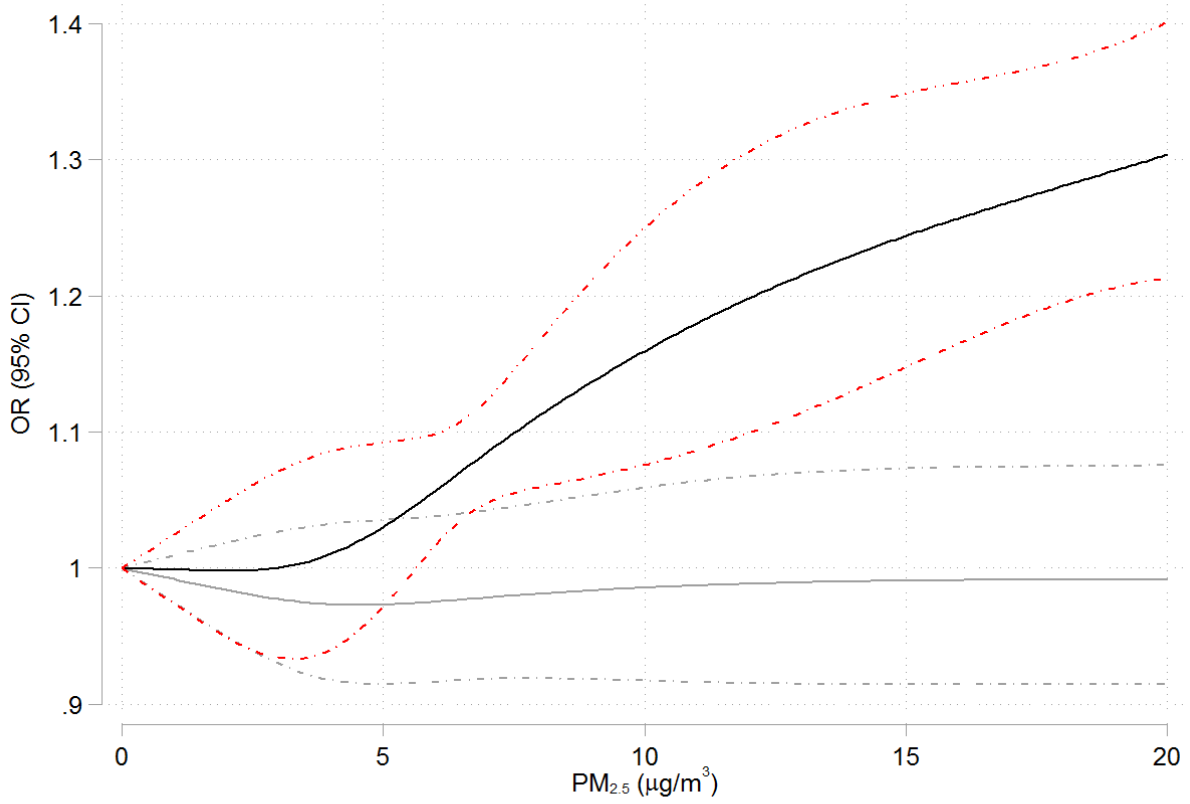

Supplement: 12940_2016_129_MOESM3_ESM.pdf [file 12940_2016_129_MOESM3_ESM.pdf]
