# Supplementary material for: Ambient PM2.5 and risk of emergency room visits for myocardial infarction: impact of regional PM2.5 oxidative potential: a case-crossover study
Source: PubMed Central journal article supplement (PMC4806515; doi:10.1186/s12940-016-0129-9), 2016-03-24
Supplement: 12940_2016_129_MOESM1_ESM.pdf [file 12940_2016_129_MOESM1_ESM.pdf]

ADDITIONAL FILE 1

Ambient PM<sub>2.5</sub> and Risk of Emergency Room Visits for Myocardial Infarction:  
Impact of Regional PM<sub>2.5</sub> Oxidative Potential: A Case-Crossover Study

Scott Weichenthal  
Health Canada  
269 Laurier Ave West, Ottawa, Ontario, Canada, K1A 0K9  
Email: scott.weichenthal@hc-sc.gc.ca

Eric Lavigne  
Health Canada  
269 Laurier Ave West, Ottawa, Ontario, Canada, K1A 0K9  
Email: eric.lavigne@hc-sc.gc.ca

Greg Evans  
University of Toronto  
200 College St, Toronto, Ontario, Canada, M5S 3E5  
greg.evans@utoronto.ca

Krystal Pollitt  
University of Massachusetts  
686 North Pleasant Street, Amherst, Massachusetts, 01003, USA  
kpollitt@umass.edu

Rick T Burnett  
Health Canada  
50 Colombine Driveway, Ottawa, Ontario, Canada, K1A 0K9  
Email: rick.burnett@hc-sc.gc.ca

**Correspondence\***

Scott Weichenthal  
269 Laurier Ave West, Ottawa, Ontario, Canada, K1A 0K9  
Telephone: 613-948-7765; Fax: 613-954-7612; Email: scott.weichenthal@hc-sc.gc.ca

## Supplemental Tables

Table S1. Descriptive statistics for myocardial infarction cases in Ontario, Canada (2004-2011)

| Location           | No. Cases | % Male | Mean Age (SD) (years) |
|--------------------|-----------|--------|-----------------------|
| All Sites Combined | 30,101    | 64     | 67.5 (15)             |
| Barrie             | 80        |        |                       |
| Burlington         | 1593      |        |                       |
| Chatham            | 736       |        |                       |
| Cornwall           | 1006      |        |                       |
| Guelph             | 394       |        |                       |
| Hamilton-Downtown  | 1065      |        |                       |
| Hamilton-Mountain  | 1117      |        |                       |
| Hamilton-West      | 168       |        |                       |
| Kingston           | 1109      |        |                       |
| Kitchener          | 4803      |        |                       |
| Mississauga        | 1578      |        |                       |
| Oshawa             | 347       |        |                       |
| Peterborough       | 2081      |        |                       |
| Sarnia             | 494       |        |                       |
| St Catherines      | 1393      |        |                       |
| Sudbury            | 1566      |        |                       |
| Thunder Bay        | 662       |        |                       |
| Toronto-Downtown   | 3029      |        |                       |
| Toronto-East       | 5027      |        |                       |
| Toronto-North      | 1853      |        |                       |

Table S2. Daily concentrations of ambient air pollutants in Ontario (2004-2011)

| Air Pollutant                                        | Mean (SD)   | Median (IQR) | Range      |
|------------------------------------------------------|-------------|--------------|------------|
| PM <sub>2.5</sub> (µg/m <sup>3</sup> )               | 6.91 (5.97) | 5.12 (5.75)  | <1- 56.8   |
| PM <sub>2.5</sub> *GSH (% Depletion/m <sup>3</sup> ) | 1.10 (1.19) | 0.71 (1.01)  | <1-15.7    |
| PM <sub>2.5</sub> *AA (% Depletion/m <sup>3</sup> )  | 1.63 (1.51) | 1.17 (1.38)  | <1-18.0    |
| NO <sub>2</sub> (ppb)                                | 12.3 (7.63) | 10.8 (10.3)  | <1- 65     |
| O <sub>3</sub> (ppb)                                 | 25.7 (10.3) | 25.1 (14.2)  | <1 – 79.5  |
| O <sub>x</sub> (ppb)                                 | 38.0 (10)   | 37.2 (13)    | 9.6-88     |
| O <sub>x</sub> <sup>wt</sup> (ppb)                   | 21.2 (6.3)  | 20.7 (8.6)   | 4.5-54     |
| Temperature (°C)                                     | 8.05 (10.4) | 8.60 (16.8)  | -29 – 31.5 |
| Relative Humidity (%)                                | 74.3 (11.9) | 75.0 (16.4)  | 27-100     |

PM<sub>2.5</sub>\*GSH, glutathione-related oxidative burden; PM<sub>2.5</sub>\*AA, ascorbate-related oxidative burden; O<sub>x</sub>, sum of NO<sub>2</sub> and O<sub>3</sub>; O<sub>x</sub><sup>wt</sup>, redox-weighted average of NO<sub>2</sub> and O<sub>3</sub>; IQR, inter-quartile range.

Table S3. Percent change in risk of emergency room visits for myocardial infarction with PM<sub>2.5</sub> and PM<sub>2.5</sub> oxidative burden in Ontario, Canada (2004-2011)

| Outcome               | Lag        | Exposure                                  |                                                |                                               |
|-----------------------|------------|-------------------------------------------|------------------------------------------------|-----------------------------------------------|
|                       |            | PM <sub>2.5</sub><br>% Change<br>(95% CI) | PM <sub>2.5</sub> *GSH<br>% Change<br>(95% CI) | PM <sub>2.5</sub> *AA<br>% Change<br>(95% CI) |
| Myocardial Infarction | 0          | 1.5 (-0.10, 3.1)                          | 2.6 (1.1, 4.1)                                 | 1.3 (0.1, 2.6)                                |
|                       | 1          | 0.90 (-0.005, 2.3)                        | 1.5 (0.0, 3.2)                                 | 0.70 (-0.005, 1.9)                            |
|                       | 2          | 0.30 (-0.01, 1.6)                         | 0.30 (-0.012, 1.8)                             | 0.30 (-0.010, 1.6)                            |
|                       | 3-day mean | 1.7 (-0.006, 4.1)                         | 2.6 (0.2, 5.0)                                 | 1.5 (-0.006, 3.6)                             |

Risk estimates reflect a 5 µg/m<sup>3</sup> change in PM<sub>2.5</sub> and a 1-unit change in PM<sub>2.5</sub>\*GSH and PM<sub>2.5</sub>\*AA. All models are adjusted for 3-day mean ambient temperature and relative humidity (cubic splines).

Table S4. Percent change in risk of emergency room visits for myocardial infarction associated with 3-day mean NO<sub>2</sub>, O<sub>3</sub>, and O<sub>x</sub> Ontario, Canada (2004-2011).

| Models                         | Percent Change<br>(95% CI) | Adjusted for<br>Lag-0 PM <sub>2.5</sub> | Adjusted for Lag-0<br>PM <sub>2.5</sub> *GSH |
|--------------------------------|----------------------------|-----------------------------------------|----------------------------------------------|
|                                |                            | Percent Change<br>(95% CI)              | Percent Change<br>(95% CI)                   |
| <i>Single Pollutant Models</i> |                            |                                         |                                              |
| NO <sub>2</sub>                | 4.4 (-0.30, 9.2)           | 3.7 (-0.70, 8.4)                        | 2.8 (-1.6, 7.3)                              |
| O <sub>3</sub>                 | 2.2 (-0.80, 5.2)           | 1.3 (-1.8, 4.6)                         | 1.2 (-1.9, 4.4)                              |
| <i>Two Pollutant Models</i>    |                            |                                         |                                              |
| NO <sub>2</sub>                | 6.0 (1.1, 11)              | 5.7 (0.64, 11)                          | 4.2 (-0.50, 9.1)                             |
| O <sub>3</sub>                 | 3.9 (0.94, 7.0)            | 3.2 (-0.020, 6.9)                       | 2.6 (-0.70, 5.9)                             |
| <i>Combined Oxidant Model</i>  |                            |                                         |                                              |
| O <sub>x</sub>                 | 4.7 (1.9, 7.6)             | 3.9 (0.65, 7.3)                         | 3.1 (0.15, 6.1)                              |
| O <sub>x</sub> -weighted       | 6.6 (2.2, 11)              | 4.7 (-0.60, 10)                         | 3.9 (-0.01, 9.0)                             |

AIC, Akaike Information Criterion; O<sub>x</sub>, sum of NO<sub>2</sub> and O<sub>3</sub>; O<sub>x</sub><sup>wt</sup>, redox-weighted average of NO<sub>2</sub> and O<sub>3</sub>. All risk estimates reflect a 10 ppb change in exposure. All models are adjusted for 3-day mean ambient temperature and relative humidity (cubic splines).

Table S5. Percent change in risk of emergency room visits for myocardial infarction with lag-0 PM<sub>2.5</sub> and PM<sub>2.5</sub> oxidative burden in Ontario, Canada (2004-2011): evaluation of effect modification by gender

| Exposure               | Gender  | Percent Change (95% CI) |
|------------------------|---------|-------------------------|
| PM <sub>2.5</sub>      | Overall | 1.5 (-0.10, 3.1)        |
|                        | Men     | 2.1 (-0.10, 4.4)        |
|                        | Women   | 0.41 (-2.0, 3.2)        |
|                        |         | p=0.350                 |
| PM <sub>2.5</sub> *GSH | Overall | 2.6 (1.1, 4.1)          |
|                        | Men     | 3.6 (1.2, 5.9)          |
|                        | Women   | 0.93 (-2.0, 4.3)        |
|                        |         | p=0.385                 |
| PM <sub>2.5</sub> *AA  | Overall | 1.3 (0.10, 2.6)         |
|                        | Men     | 1.9 (0.12, 3.7)         |
|                        | Women   | 0.41 (-2.0, 2.5)        |
|                        |         | p=0.455                 |

Risk estimates reflect a 5 µg/m<sup>3</sup> change in PM<sub>2.5</sub> and a 1-unit change in PM<sub>2.5</sub>\*GSH and PM<sub>2.5</sub>\*AA. All models are adjusted for 3-day mean ambient temperature and relative humidity (cubic splines).

Table S6. Percent change in risk of emergency room visits for myocardial infarction with PM<sub>2.5</sub> and PM<sub>2.5</sub> oxidative burden in Ontario, Canada (2004-2011): evaluation of effect modification by age

| Outcome               | Exposure Lag | Age (years) | Exposure                                  |                                                |                                               |
|-----------------------|--------------|-------------|-------------------------------------------|------------------------------------------------|-----------------------------------------------|
|                       |              |             | PM <sub>2.5</sub><br>% Change<br>(95% CI) | PM <sub>2.5</sub> *GSH<br>% Change<br>(95% CI) | PM <sub>2.5</sub> *AA<br>% Change<br>(95% CI) |
| Myocardial Infarction | Lag-0        | All         | 1.5 (-0.10, 3.1)                          | 2.6 (1.1, 4.1)                                 | 1.3 (0.1, 2.6)                                |
|                       |              | <56         | 3.3 (0.61, 6.1)                           | 4.5 (1.3, 7.9)                                 | 3.3 (0.81, 5.8)                               |
|                       |              | 57-68       | 0.28 (-3.1, 3.7)                          | 1.8 (-1.1, 4.8)                                | 0.31 (-2.6, 3.3)                              |
|                       |              | 69-79       | 1.9 (-1.2, 5.1)                           | 3.4 (-0.4, 7.4)                                | 1.7 (-0.70, 4.0)                              |
|                       |              | >79         | 0.79 (-1.6, 3.2)                          | 1.1 (-1.9, 4.1)                                | 0.51 (-1.3, 2.3)                              |
|                       |              | p=0.664     | p=0.448                                   | p=0.404                                        |                                               |

Risk estimates reflect a 5 µg/m<sup>3</sup> change in PM<sub>2.5</sub> and a 1-unit change in PM<sub>2.5</sub>\*GSH and PM<sub>2.5</sub>\*AA. All models are adjusted for 3-day mean ambient temperature and relative humidity (cubic splines).

Table S7. Percent change in risk of emergency room visits for myocardial infarction associated with Lag-0 PM<sub>2.5</sub> and PM<sub>2.5</sub> oxidative burden in Ontario, Canada (2004-2011) with sensitivity analyses including additional adjustment for 3-day mean ambient NO<sub>2</sub>, O<sub>3</sub>, O<sub>x</sub>, or O<sub>x</sub><sup>wt</sup>

| Exposure               | Covariate added                    | Percent Change (95% CI) |
|------------------------|------------------------------------|-------------------------|
| PM <sub>2.5</sub>      | Base model                         | 1.5 (-0.10, 3.1)        |
|                        | NO <sub>2</sub>                    | 0.8 (-0.60, 2.1)        |
|                        | O <sub>3</sub>                     | 1.4 (-0.20, 3.0)        |
|                        | NO <sub>2</sub> and O <sub>3</sub> | 0.29 (-1.3, 1.9)        |
|                        | O <sub>x</sub>                     | 0.59 (-1.2, 2.4)        |
|                        | O <sub>x</sub> <sup>wt</sup>       | 1.1 (-0.7, 2.8)         |
| PM <sub>2.5</sub> *GSH | Base model                         | 2.6 (1.1, 4.1)          |
|                        | NO <sub>2</sub>                    | 2.0 (0.5, 3.6)          |
|                        | O <sub>3</sub>                     | 2.4 (0.8, 4.1)          |
|                        | NO <sub>2</sub> and O <sub>3</sub> | 1.7 (0.010, 3.4)        |
|                        | O <sub>x</sub>                     | 1.8 (0.16, 3.6)         |
|                        | O <sub>x</sub> <sup>wt</sup>       | 2.2 (0.57, 3.8)         |
| PM <sub>2.5</sub> *AA  | Base model                         | 1.3 (0.1, 2.6)          |
|                        | NO <sub>2</sub>                    | 0.8 (-0.30, 1.8)        |
|                        | O <sub>3</sub>                     | 1.2 (-0.20, 2.6)        |
|                        | NO <sub>2</sub> and O <sub>3</sub> | 0.43 (-0.70, 1.6)       |
|                        | O <sub>x</sub>                     | 0.64 (-0.70, 2.0)       |
|                        | O <sub>x</sub> <sup>wt</sup>       | 1.0 (-0.30, 2.3)        |

O<sub>x</sub>, sum of NO<sub>2</sub> and O<sub>3</sub>; O<sub>x</sub><sup>wt</sup>, redox-weighted average of NO<sub>2</sub> and O<sub>3</sub>. Risk estimates reflect a 5 µg/m<sup>3</sup> change in PM<sub>2.5</sub> and a 1-unit change in PM<sub>2.5</sub>\*GSH and PM<sub>2.5</sub>\*AA. All models are adjusted for 3-day mean ambient temperature and relative humidity (cubic splines).



Table S8. Impact of regional PM<sub>2.5</sub> oxidative potential on the relationship between ambient PM<sub>2.5</sub> and hospitalization for myocardial infarction and asthma

| Exposure               | Percentile of Oxidative Potential |                      |                      |                     |                     |
|------------------------|-----------------------------------|----------------------|----------------------|---------------------|---------------------|
|                        | % Change (95% CI)                 |                      |                      |                     |                     |
|                        | < 25 <sup>th</sup>                | 25-50 <sup>th</sup>  | >50-75 <sup>th</sup> | >75 <sup>th</sup>   | > 90 <sup>th</sup>  |
| OP <sup>GSH</sup>      |                                   |                      |                      |                     |                     |
| Lag0 PM <sub>2.5</sub> | -1.4<br>(-2.7, 0.0)               | 1.4<br>(-0.08, 3.6)  | 2.0<br>(0.0060, 3.9) | 4.1<br>(0.26, 8.0)  | 7.9<br>(4.1, 12)    |
| OP <sup>AA</sup>       |                                   |                      |                      |                     |                     |
| Lag0 PM <sub>2.5</sub> | 2.5<br>(-0.50, 5.6)               | -1.0<br>(-2.7, 0.76) | 1.5<br>(-0.90, 4.0)  | 2.8<br>(-0.80, 6.6) | 0.87<br>(-1.6, 3.3) |

Risk estimates reflect a 5 µg/m<sup>3</sup> change in PM<sub>2.5</sub>. All models are adjusted for 3-day mean ambient temperature and relative humidity (cubic splines).

Table S9. Percent change (95% CI) in risk of emergency room visits for myocardial infarction associated with PM<sub>2.5</sub> across strata of regional OP<sup>GSH</sup> and daily O<sub>x</sub>

| Percentile of<br>3-day mean O <sub>x</sub> | Percentile of Regional OP <sup>GSH</sup> |                     |                    |                    |
|--------------------------------------------|------------------------------------------|---------------------|--------------------|--------------------|
|                                            | ≤50 <sup>th</sup>                        | > 50 <sup>th</sup>  | > 75 <sup>th</sup> | > 90 <sup>th</sup> |
| ≤50 <sup>th</sup>                          | -1.1<br>(-4.3, 2.2)                      | 0.95<br>(-3.9, 6.0) | 3.8<br>(-2.4, 11)  | 8.8<br>(-1.3, 20)  |
| > 50 <sup>th</sup>                         | 1.7<br>(-0.10, 3.5)                      | 4.8<br>(1.9, 7.7)   | 5.6<br>(0.49, 11)  | 11<br>(8.0, 13)    |
| > 75 <sup>th</sup>                         | 3.2<br>(-0.80, 7.3)                      | 6.7<br>(2.7, 11)    | 8.2<br>(1.1, 16)   | 17<br>(10, 24)     |
| > 90 <sup>th</sup>                         | 0.90<br>(-4.6, 6.8)                      | 6.3<br>(-1.2, 14)   | 3.8<br>(-1.6, 9.4) | 16<br>(6.0, 26)    |

Risk estimates reflect a 5 µg/m<sup>3</sup> change in PM<sub>2.5</sub>. All models are adjusted for 3-day mean ambient temperature and relative humidity (cubic splines).
