# Supplementary material for: Ambient PM2.5 and risk of emergency room visits for myocardial infarction: impact of regional PM2.5 oxidative potential: a case-crossover study
Source: PubMed Central journal article supplement (PMC4806515; doi:10.1186/s12940-016-0129-9), 2016-03-24
Supplement: 12940_2016_129_MOESM2_ESM.pdf [file 12940_2016_129_MOESM2_ESM.pdf]

ADDITIONAL FILE 2

Ambient PM<sub>2.5</sub> and Risk of Emergency Room Visits for Myocardial Infarction:  
Impact of Regional PM<sub>2.5</sub> Oxidative Potential: A Case-Crossover Study

Scott Weichenthal  
Health Canada  
269 Laurier Ave West, Ottawa, Ontario, Canada, K1A 0K9  
Email: scott.weichenthal@hc-sc.gc.ca

Eric Lavigne  
Health Canada  
269 Laurier Ave West, Ottawa, Ontario, Canada, K1A 0K9  
Email: eric.lavigne@hc-sc.gc.ca

Greg Evans  
University of Toronto  
200 College St, Toronto, Ontario, Canada, M5S 3E5  
greg.evans@utoronto.ca

Krystal Pollitt  
University of Massachusetts  
686 North Pleasant Street, Amherst, Massachusetts, 01003, USA  
kpollitt@umass.edu

Rick T Burnett  
Health Canada  
50 Colombine Driveway, Ottawa, Ontario, Canada, K1A 0K9  
Email: rick.burnett@hc-sc.gc.ca

**Correspondence\***

Scott Weichenthal  
269 Laurier Ave West, Ottawa, Ontario, Canada, K1A 0K9  
Telephone: 613-948-7765; Fax: 613-954-7612; Email: scott.weichenthal@hc-sc.gc.ca

## Supplemental Methods

### Laboratory Analysis of Regional Oxidative Potential

Integrated PM<sub>2.5</sub> samples were equilibrated for 24 hours in a weighing room with temperature (18-22 °C) and humidity (45-50%) controls. Filters were weighed pre- and post-extraction using a Sartorius model MC5 microbalance and PM was extracted from filter samples into HPLC grade methanol through sonication with a titanium probe sonicator operated at an amplitude of 5 microns for 30 seconds. Filters were then rinsed with additional methanol and sample extracts were dried with nitrogen gas in a water bath heated to 37 °C. Samples were re-suspended in a 5% methanol/ultrapure water solution to 75 µg/mL. The extraction efficiency for each filter sample was calculated by comparing station- reported filter masses with the net loss of filter mass from the filters, pre- to post-extraction. The median extraction efficiency was 97%.

Re-suspended PM<sub>2.5</sub> samples were incubated with a synthetic human respiratory tract lining fluid for 4 hours at 37 °C (1-2). This fluid was a 200 µM composite solution of physiologically-relevant antioxidants including ascorbate (AA), urate, and glutathione (GSH). Glutathione and ascorbate depletion were used to measure regional PM<sub>2.5</sub> oxidative potential expressed on a per mass basis (% depletion/µg). This operationally defined metric described the portion of the initial 200 µM reacted over four hours normalized by the 75 µg/mL PM<sub>2.5</sub> used in the assay. Urate was not included as PM does not have an important impact on urate depletion (2-3). The plate was incubated at 37 °C in a UV-vis plate reader (Molecular Devices, SpectraMax 190). Ascorbate-related oxidative potential was measured using absorbance spectra and percent ascorbate depletion was measured as the percent change in absorbance at a wavelength of 260 nm over the 4-hour incubation period.

After the 4-hour incubation period, the remaining reduced glutathione concentration was determined using the oxidized glutathione -reductase-5,5'-dithio-bis(2-nitrobenzoic acid)

recycling assay (4). Glutathione-related oxidative potential was expressed as the percent change between each sample and a 4-hour incubated water blank. PM<sub>2.5</sub> samples and controls were analyzed in triplicate on a 96-well plate at a final concentration of 75 µg PM/mL. Known positive (non-ferrous dust, NRC PD-1) and negative (carbon black, Arosperse 15B) controls were run in parallel with PM<sub>2.5</sub> samples to evaluate inter-experimental standardization .

### **Supplemental References**

1. Godri KJ, Harrison RM, Evans T, Baker T, Dunster C, Mudway IS, et al. Increased oxidative burden associated with traffic component of ambient particulate matter at roadside and urban background schools sites in London. *PloS ONE* 2011; 6:e21961.
2. Mudway IS, Stenfors N, Duggan ST, Roxborough H, Zielinski H, Marklund SL, et al. An in vitro and in vivo investigation of the effects of diesel exhaust on human airway lining fluid antioxidants. *Arch Biochem Biophys* 2004; 423:200–212.
3. Künzli, N, Mudway IS, Botschi T, Shi T, Kelly FJ, Cook S, et al. Comparison of oxidative properties, light absorbance, and total and elemental mass concentration of ambient PM<sub>2.5</sub> collected at 20 European sites. *Environ Health Perspect* 2006; 114: 684-690.
4. Baker MA, Cerniglia GJ, Zaman A. Microtiter plate assay for the measurement of glutathione and glutathione disulfide in large numbers of biological samples. *Anal Biochem* 1990; 190: 360-365.
